# Supplementary material for: Measuring the concordance between endoscopic and histologic inflammation and its effect on IBD-associated dysplasia
Source: PubMed Central journal article supplement — Endosc Int Open. 2024 Jan 30;12(1):E145–54. doi: 10.1055/a-2204-8166 (PMC10827477; doi:10.1055/a-2204-8166), 2024-01-30

## Supplementary material

**Supplementary Table 1** Patient characteristics and risk factors in association with endoscopic and histologic inflammation.

| Risk factors/patient level characteristics | Inactive (N = 599) | Mild (N = 242)    | Moderate (N = 87)  | Severe (N = 27)   | P value |
|--------------------------------------------|--------------------|-------------------|--------------------|-------------------|---------|
| <b>Gender</b>                              |                    |                   |                    |                   |         |
| <b>F</b>                                   | 236 (39.4%)        | 78 (32.2%)        | 38 (43.7%)         | 11 (40.7%)        | 0.158   |
| <b>M</b>                                   | 363 (60.6%)        | 164 (67.8%)       | 49 (56.3%)         | 16 (59.3%)        |         |
| <b>Age at procedure</b>                    |                    |                   |                    |                   |         |
| <b>Median (Q1, Q3)</b>                     | 59.0 (45.0, 67.0)  | 55.0 (43.0, 64.0) | 53.0 (42.5, 67.35) | 42.0 (35.0, 58.5) | < 0.001 |
| <b>Mean (SD)</b>                           | 56.2 (14.5)        | 53.7 (14.3)       | 53.5 (15.5)        | 46.2 (16.8)       |         |
| <b>Years since IBD diagnosis</b>           |                    |                   |                    |                   |         |
| <b>Median (Q1, Q3)</b>                     | 13.3 (7.8, 22.0)   | 12.7 (6.9, 21.0)  | 10.7 (5.4, 24.2)   | 10.3 (8.5, 14.3)  | 0.612   |
| <b>Mean (SD)</b>                           | 15.8 (11.3)        | 15.4 (11.6)       | 15.2 (13.3)        | 12.4 (6.7)        |         |
| <b>Age at diagnosis</b>                    |                    |                   |                    |                   |         |
| <b>Median (Q1, Q3)</b>                     | 39.0 (26.0, 52.0)  | 33.0 (25.0, 51.0) | 38.0 (26.0, 50.2)  | 28.5 (20.8, 49.5) | 0.437   |
| <b>Mean (SD)</b>                           | 39.3 (15.9)        | 37.1 (16.3)       | 38.5 (18.0)        | 35.7 (18.8)       |         |
| <b>Disease</b>                             |                    |                   |                    |                   |         |
| <b>UC</b>                                  | 384 (64.6%)        | 167 (69.0%)       | 66 (75.9%)         | 17 (63.0%)        | 0.394   |

## Supplementary material

|                                                                            |                           |                       |                          |                       |                |
|----------------------------------------------------------------------------|---------------------------|-----------------------|--------------------------|-----------------------|----------------|
| <b>CD</b>                                                                  | 204 (34.3%)               | 74 (30.6%)            | 20 (23.0%)               | 10 (37.0%)            |                |
| <b>History of smoking at index procedure</b>                               |                           |                       |                          |                       |                |
| <b>Yes</b>                                                                 | 53 (11.9%)                | 20 (10.8%)            | 11 (17.5%)               | 2 (9.5%)              | 0.541          |
| <b>No</b>                                                                  | 394 (88.1%)               | 165 (89.2%)           | 52 (82.5%)               | 19 (90.5%)            |                |
| <b>PSC at index</b>                                                        |                           |                       |                          |                       |                |
| <b>Yes</b>                                                                 | 82 (18.4%)                | 42 (22.6%)            | 21 (33.3%)               | 6 (28.6%)             | 0.036          |
| <b>No</b>                                                                  | 82 (18.4%)                | 144 (77.4%)           | 42 (66.7%)               | 15 (71.4%)            |                |
| <b>History of random dysplasia at prior surveillance</b>                   |                           |                       |                          |                       |                |
| <b>HGD</b>                                                                 | 7 (1.6%)                  | 7 (3.8%)              | 1 (1.6%)                 | 0 (0.0%)              | 0.319          |
| <b>LGD</b>                                                                 | 69 (15.5%)                | 21 (11.4%)            | 8 (12.7%)                | 1 (4.8%)              |                |
| <b>No dysplasia</b>                                                        | 370 (83.0%)               | 157 (84.9%)           | 54 (85.7%)               | 20 (95.2%)            |                |
| <b>Family History of CRC</b>                                               |                           |                       |                          |                       |                |
| <b>Yes</b>                                                                 | 111 (25.9%)               | 43 (24.4%)            | 12 (21.4%)               | 4 (21.1%)             | 0.863          |
| <b>No</b>                                                                  | 318 (74.1%)               | 133 (75.6%)           | 44 (78.6%)               | 15 (78.9%)            |                |
| <b>Patient characteristics in association with histologic inflammation</b> |                           |                       |                          |                       |                |
| <b>Risk factors/patient level characteristics</b>                          | <b>Inactive (N = 567)</b> | <b>Mild (N = 301)</b> | <b>Moderate (N = 82)</b> | <b>Severe (N = 3)</b> | <b>P value</b> |
| <b>Gender</b>                                                              |                           |                       |                          |                       |                |
| <b>Female</b>                                                              | 230 (40.6%)               | 107 (35.5%)           | 29 (35.4%)               | 0 (0.0%)              | 0.226          |

## Supplementary material

|                                                          |                   |                   |                   |                   |                  |
|----------------------------------------------------------|-------------------|-------------------|-------------------|-------------------|------------------|
| <b>Male</b>                                              | 337 (59.4%)       | 194 (64.5%)       | 53 (64.6%)        | 3 (100.0%)        |                  |
| <b>Age at procedure</b>                                  |                   |                   |                   |                   |                  |
| <b>Median (Q1, Q3)</b>                                   | 59.0 (46.0, 67.0) | 55.0 (42.0, 66.0) | 49.5 (37.0, 66.2) | 37.0 (33.0, 42.5) | <b>&lt;0.001</b> |
| <b>Mean (SD)</b>                                         | 56.4 (14.1)       | 53.7 (15.1)       | 50.9 (16.4)       | 38.0 (9.5)        |                  |
| <b>Years since IBD diagnosis</b>                         |                   |                   |                   |                   |                  |
| <b>Median (Q1, Q3)</b>                                   | 13.3 (7.5, 21.4)  | 12.7 (6.5, 22.1)  | 11.5 (6.9, 18.6)  | 12.2 (7.8, 16.7)  | 0.883            |
| <b>Mean (SD)</b>                                         | 15.6 (11.2)       | 15.6 (12.1)       | 14.5 (10.8)       | 12.2 (12.7)       |                  |
| <b>Age at diagnosis</b>                                  |                   |                   |                   |                   |                  |
| <b>Median (Q1, Q3)</b>                                   | 39.0 (26.0, 53.0) | 35.0 (25.0, 48.2) | 36.0 (22.2, 51.0) | 26.0 (25.5, 26.5) | 0.268            |
| <b>Mean (SD)</b>                                         | 39.4 (16.0)       | 37.1 (16.4)       | 37.8 (17.2)       | 26.0 (1.4)        |                  |
| <b>Disease</b>                                           |                   |                   |                   |                   |                  |
| <b>UC</b>                                                | 373 (66.5%)       | 194 (64.5%)       | 61 (74.4%)        | 3 (100.0%)        | 0.400            |
| <b>CD</b>                                                | 182 (32.4%)       | 106 (35.2%)       | 20 (24.4%)        | 0 (0.0%)          |                  |
| <b>History of smoking at index</b>                       |                   |                   |                   |                   |                  |
| <b>Yes</b>                                               | 47 (11.3%)        | 28 (11.9%)        | 11 (17.7%)        | 0 (0.0%)          | 0.493            |
| <b>No</b>                                                | 369 (88.7%)       | 208 (88.1%)       | 51 (82.3%)        | 2 (100.0%)        |                  |
| <b>PSC at index</b>                                      |                   |                   |                   |                   |                  |
| <b>Yes</b>                                               | 79 (19.0%)        | 54 (22.9%)        | 15 (24.2%)        | 2 (100.0%)        | <b>0.025</b>     |
| <b>No</b>                                                | 336 (81.0%)       | 182 (77.1%)       | 47 (75.8%)        | 0 (0.0%)          |                  |
| <b>History of random dysplasia in prior surveillance</b> |                   |                   |                   |                   |                  |
| <b>HGD</b>                                               | 6 (1.4%)          | 9 (3.8%)          | 0 (0.0%)          | 0 (0.0%)          | 0.115            |

## Supplementary material

|                              |             |             |            |            |       |
|------------------------------|-------------|-------------|------------|------------|-------|
| <b>LGD</b>                   | 53 (12.8%)  | 41 (17.4%)  | 6 (9.7%)   | 0 (0.0%)   |       |
| <b>No dysplasia</b>          | 356 (85.8%) | 186 (78.8%) | 56 (90.3%) | 2 (100.0%) |       |
| <b>Family history of CRC</b> |             |             |            |            |       |
| <b>Yes</b>                   | 100 (25.1%) | 52 (23.2%)  | 13 (22.8%) | 0 (0.0%)   | 0.801 |
| <b>No</b>                    | 298 (74.9%) | 172 (76.8%) | 44 (77.2%) | 2 (100.0%) |       |

SD, standard deviation; IBD, inflammatory bowel disease; UC, ulcerative colitis; CD, Crohn's disease; PSC, primary sclerosing cholangitis; HGD, high-grade dysplasia; LGD, low-grade dysplasia; CRC, colorectal cancer.

**Supplementary Table 1** Degrees of histologic inflammation. **a** Mild inflammation with neutrophils in epithelium. **b** Moderate inflammation with a crypt abscess. **c** Severe inflammation with multiple crypt abscesses.

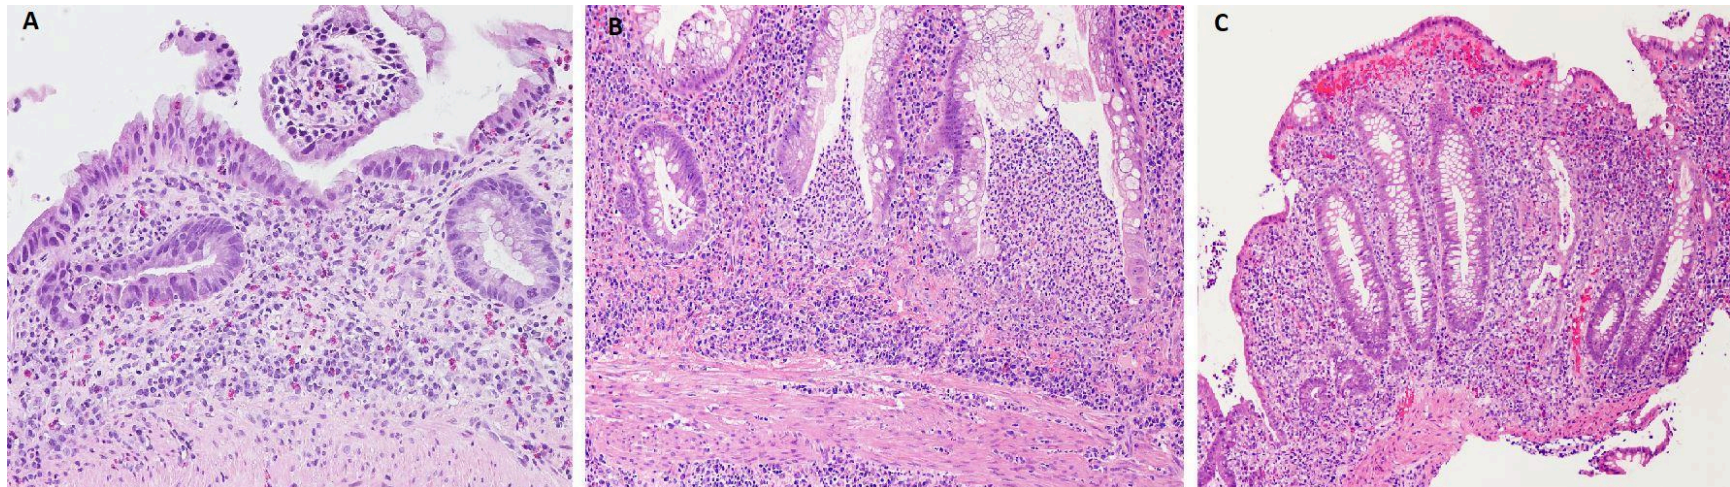

Supplement: 10-1055-a-2204-8166_22189843.pdf.pdf [file 10-1055-a-2204-8166_22189843.pdf.pdf]
